# Supplementary material for: Patterns of research utilization on patient care units
Source: Springer Nature journal article supplement (doi:10.1186/1748-5908-3-31), 2008-06-02
Supplement: 13012_2007_104_MOESM3_ESM.pdf [file 13012_2007_104_MOESM3_ESM.pdf]

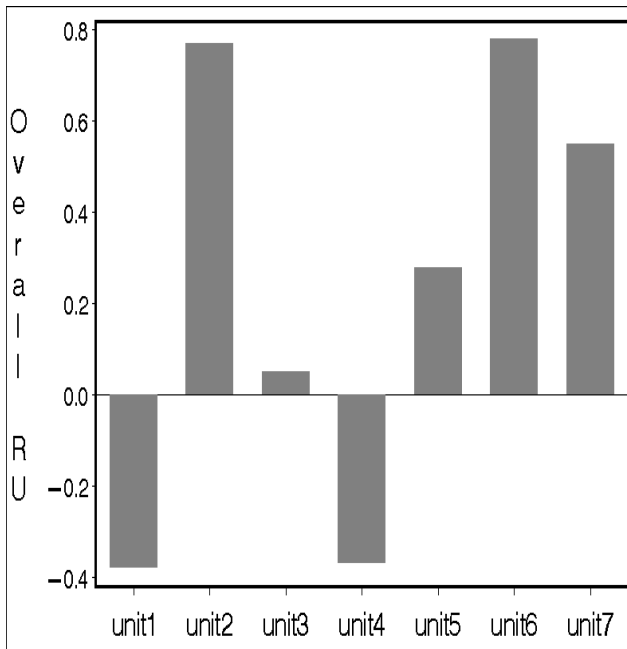

Note: reference line = “half of the shifts” = 5 on the 7-point likert scale.
