# Supplementary material for: Patterns of research utilization on patient care units
Source: Springer Nature journal article supplement (doi:10.1186/1748-5908-3-31), 2008-06-02

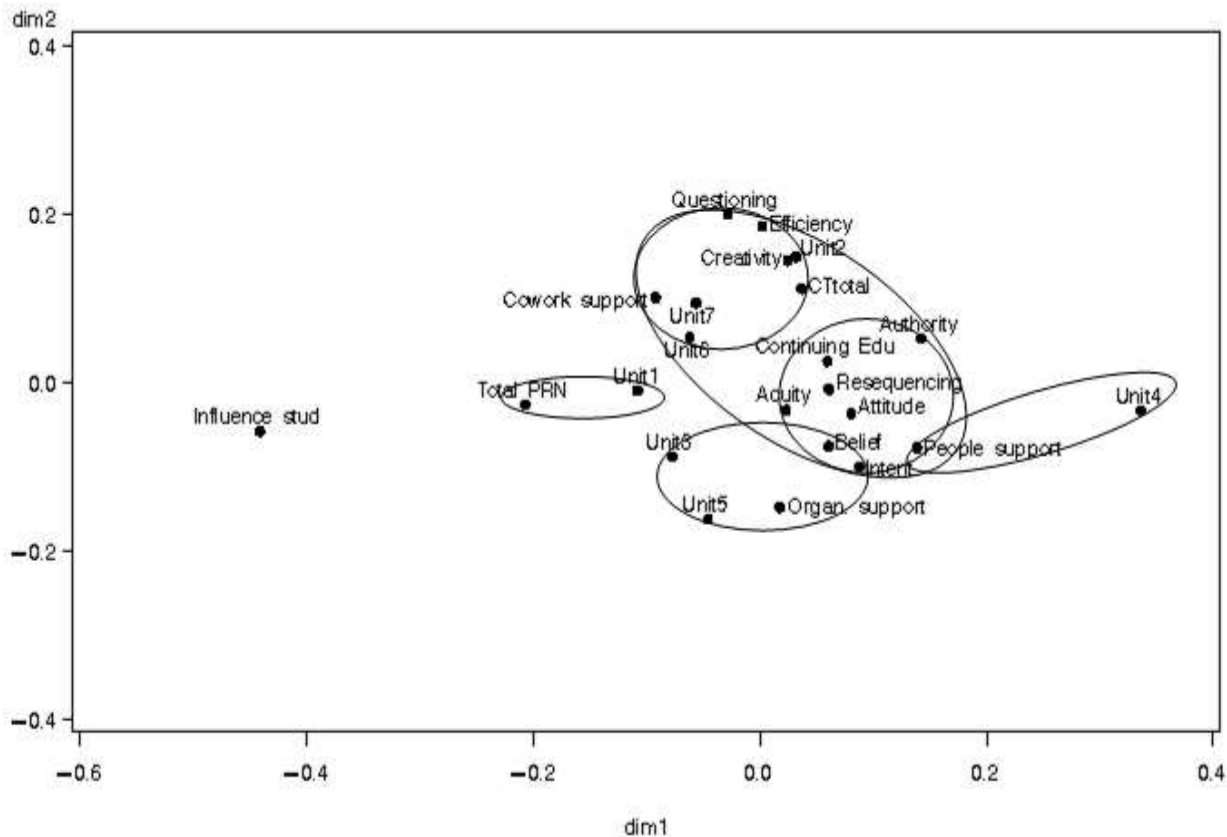

Supplement: 13012_2007_104_MOESM4_ESM.pdf [file 13012_2007_104_MOESM4_ESM.pdf]
